# Supplementary material for: Trace Metals Distribution in Tissues of 10 Different Shark Species from the Eastern Mediterranean Sea
Source: MDPI journal article supplement (doi:10.3390/fishes9020077), 2024-02-16
Supplement: s1 [file s1]

## Supplemental material

### Trace metals distribution in tissues of 10 different shark species from the eastern Mediterranean Sea

Eleni Roubie, Sotirios Karavoltzos\*, Aikaterini Sakellari, Nikolaos Katsikatsos, Manos Dassenakis and Persefoni Megalofonou\*

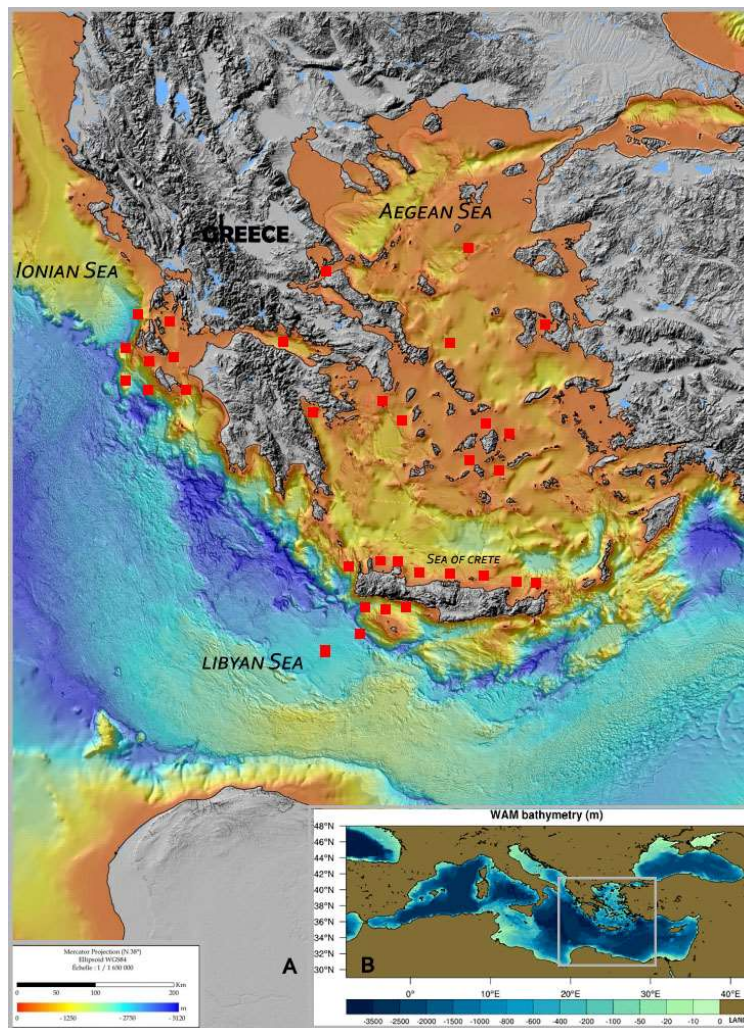

Fig. S1 Sampling sites of sharks studied.

**Table S1** Mean concentrations ( $\mu\text{g g}^{-1}$  ww) of trace elements in different tissues of *I. oxyrinchus*, *O. centrina*, *M. mobular*, *S. zygaena*, *O. ferox*, *A. superciliosus* and *H. nakamurai*. The number of specimens is in parenthesis.

| Sample                        | Al   | As   | Cd    | Co    | Cr    | Cs    | Cu   | Fe  | Hg   | Mn   | Ni    | Pb    | V     | Zn  |
|-------------------------------|------|------|-------|-------|-------|-------|------|-----|------|------|-------|-------|-------|-----|
| <i>I. oxyrinchus</i> (n=1)    |      |      |       |       |       |       |      |     |      |      |       |       |       |     |
| Muscle                        | 1.1  | 8.3  | 0.006 | 0.008 | 0.030 | 0.049 | 1.1  | 4.8 | 1.4  | 0.08 | 0.015 | 0.035 | 0.002 | 7.0 |
| Gills                         | 1.1  | 8.0  | 0.007 | 0.015 | 0.475 | 0.060 | 1.4  | 57  | 0.64 | 0.34 | 0.142 | 0.031 | 0.003 | 13  |
| Heart                         | 0.75 | 7.5  | 0.006 | 0.010 | 0.162 | 0.049 | 4.6  | 30  | 0.48 | 0.19 | 0.341 | 0.041 | 0.003 | 19  |
| <i>O. centrina</i> (n=1)      |      |      |       |       |       |       |      |     |      |      |       |       |       |     |
| Muscle                        | 1.0  | 2.8  | 0.003 | 0.009 | 0.080 | 0.017 | 0.32 | 3.0 | 0.69 | 0.10 | 0.072 | 0.024 | 0.002 | 6.5 |
| Gills                         | 0.94 | 2.6  | 0.005 | 0.012 | 0.118 | 0.018 | 0.66 | 5.2 | 1.5  | 1.4  | 0.110 | 0.017 | 0.003 | 8.6 |
| Liver                         | 2.9  | 9.8  | 0.020 | 0.024 | 0.832 | 0.044 | 0.48 | 22  | 1.6  | 0.18 | 0.400 | 0.057 | 0.010 | 8.4 |
| Heart                         | 1.9  | 4.3  | 0.006 | 0.012 | 0.330 | 0.025 | 0.50 | 33  | 2.0  | 0.19 | 0.081 | 0.035 | 0.005 | 9.9 |
| <i>M. mobular</i> (n=2)       |      |      |       |       |       |       |      |     |      |      |       |       |       |     |
| Muscle                        | 23   | 124  | 0.052 | 0.049 | 0.505 | 0.229 | 2.7  | 136 | 0.62 | 1.9  | 0.406 | 0.459 | 0.040 | 57  |
| Gills                         | 0.41 | 6.7  | 0.005 | 0.012 | 0.026 | 0.022 | 3.4  | 30  | 0.13 | 0.24 | 0.336 | 0.023 | 0.002 | 8.8 |
| <i>S. zygaena</i> (n=1)       |      |      |       |       |       |       |      |     |      |      |       |       |       |     |
| Muscle                        | 0.81 | 1.6  | 0.022 | 0.009 | 0.235 | 0.044 | 0.53 | 10  | 9.1  | 0.07 | 0.064 | 0.061 | 0.003 | 10  |
| Gills                         | 0.46 | 6.7  | 0.173 | 0.066 | 0.005 | 0.035 | 0.41 | 121 | 11   | 0.10 | 0.004 | 0.063 | 0.004 | 8.8 |
| Liver                         | 1.2  | 4.2  | 0.277 | 0.018 | 0.006 | 0.034 | 0.43 | 38  | 18   | 0.08 | 0.004 | 0.020 | 0.003 | 13  |
| <i>O. ferox</i> (n=2)         |      |      |       |       |       |       |      |     |      |      |       |       |       |     |
| Muscle                        | 0.90 | 21   | 0.006 | 0.006 | 0.132 | 0.037 | 0.16 | 6.9 | 13   | 0.14 | 0.031 | 0.067 | 0.002 | 4.8 |
| Gills                         | 29   | 11   | 0.044 | 0.070 | 0.139 | 0.029 | 0.43 | 112 | 4.2  | 5.5  | 0.224 | 0.515 | 0.038 | 6.2 |
| Liver                         | 4.7  | 8.4  | 0.158 | 0.012 | 0.055 | 0.029 | 0.57 | 24  | 6.0  | 0.19 | 0.038 | 0.087 | 0.006 | 5.6 |
| Heart                         | 0.49 | 14   | 0.011 | 0.007 | 0.006 | 0.044 | 0.88 | 40  | 1.4  | 0.13 | 0.005 | 0.046 | 0.002 | 15  |
| <i>A. superciliosus</i> (n=2) |      |      |       |       |       |       |      |     |      |      |       |       |       |     |
| Muscle                        | 1.2  | 4.6  | 0.006 | 0.006 | 0.002 | 0.073 | 0.20 | 5.1 | 0.33 | 0.09 | 0.024 | 0.022 | 0.003 | 7.8 |
| Gills                         | 0.54 | 7.0  | 0.015 | 0.006 | 0.002 | 0.032 | 0.24 | 48  | 0.03 | 0.11 | 0.003 | 0.015 | 0.003 | 7.3 |
| Liver                         | 1.4  | 12   | 0.035 | 0.016 | 0.246 | 0.152 | 3.9  | 100 | 0.30 | 0.62 | 0.099 | 0.035 | 0.005 | 44  |
| Heart                         | 0.12 | 0.54 | 0.001 | n.d.  | 0.009 | 0.007 | 0.11 | 2.0 | n.d. | 0.03 | 0.003 | 0.006 | 0.001 | 1.2 |
| <i>H. nakamurai</i> (n=1)     |      |      |       |       |       |       |      |     |      |      |       |       |       |     |
| Muscle                        | 0.24 | 9.0  | 0.003 | 0.008 | 0.038 | 0.017 | 0.34 | 2.8 | 0.24 | 0.08 | 0.030 | 0.017 | 0.002 | 3.2 |
| Gills                         | 0.75 | 4.0  | 0.007 | 0.023 | 0.097 | 0.024 | 0.52 | 11  | 0.16 | 1.6  | 0.090 | 0.104 | 0.003 | 12  |
| Liver                         | 0.22 | 3.0  | 0.009 | 0.015 | 0.085 | 0.033 | 0.82 | 11  | n.d. | 0.27 | 0.027 | 0.034 | 0.004 | 5.1 |
| Heart                         | 0.49 | 4.4  | 0.008 | 0.040 | 0.272 | 0.043 | 1.3  | 48  | 1.9  | 0.38 | 0.126 | 0.025 | 0.004 | 25  |

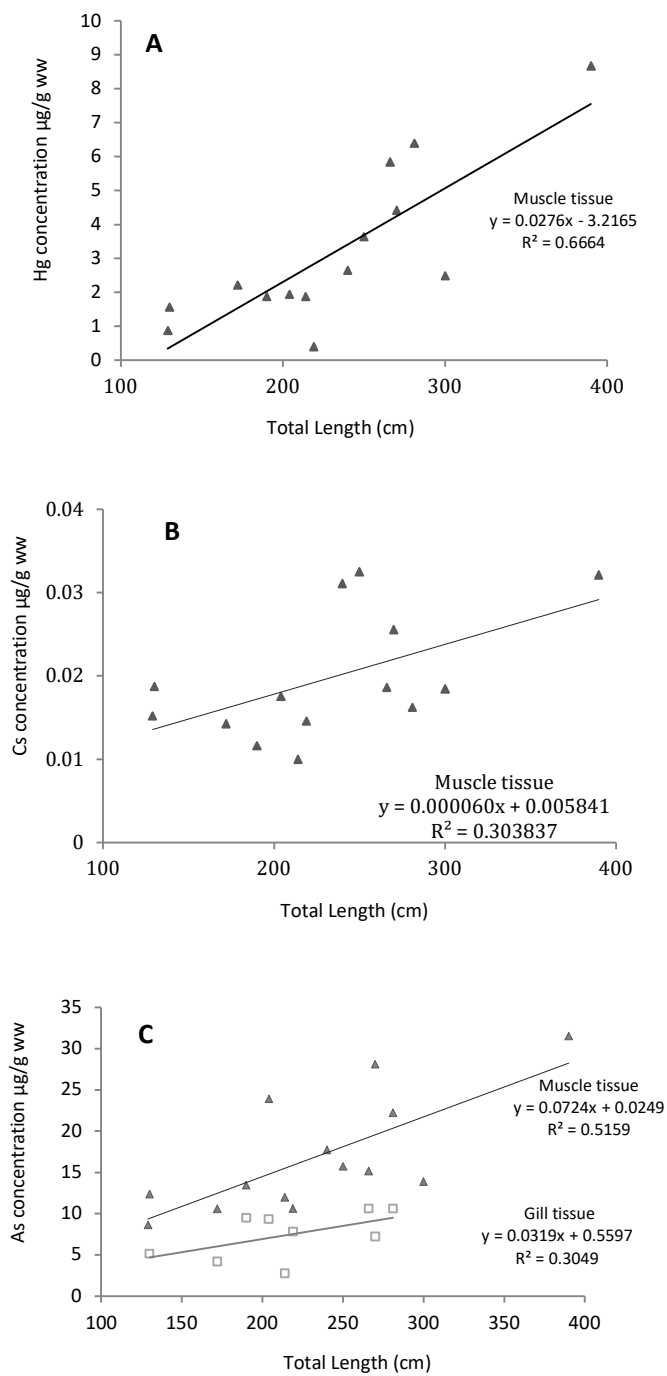

**Fig. S2** Positive correlation between total length of *P. glauca* and metal concentrations. A: Hg in muscle tissue; B: Cs in muscle tissue; C: As in muscle and gill tissue.

Table S2 Statistical parameters of principal component analysis (PCA) of trace metals in shark tissues examined.

| Tissue | Number of<br>eigenvalues>1 | % variance for PC1 and PC2 |      |
|--------|----------------------------|----------------------------|------|
|        |                            |                            |      |
| Muscle | 3                          | 67.1                       | 9.1  |
| Gills  | 5                          | 34.9                       | 22.0 |
| Heart  | 5                          | 35.2                       | 19.9 |
| Liver  | 5                          | 38.5                       | 20.9 |
| Gonads | 3                          | 42.4                       | 33.4 |
